# Supplementary material for: p53-independent ibrutinib responses in an Eμ-TCL1 mouse model demonstrates efficacy in high-risk CLL
Source: PubMed Central journal article supplement (PMC5141356; doi:10.1038/bcj.2016.41), 2016-06-10

Supplemental Figure 2

A.

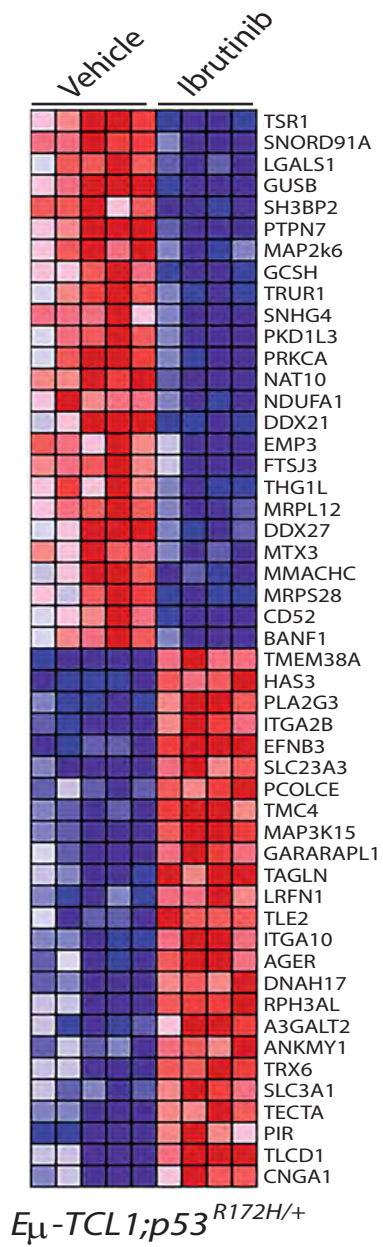

B.

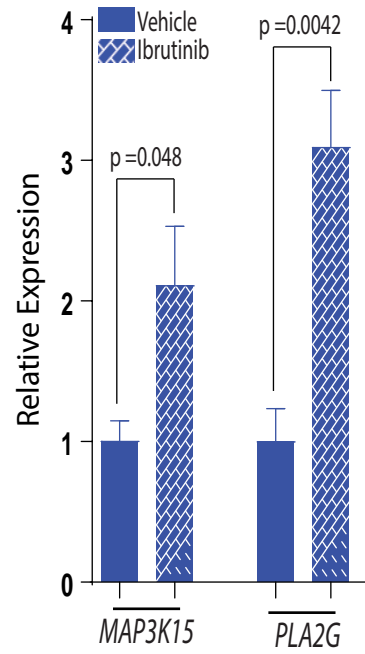

Supplement: bcj201641x2.pdf [file bcj201641x2.pdf]
